# Supplementary material
Source: PubMed Central journal article supplement (PMC1853281)

Fig. S1 IR-induced intra-S-phase checkpoint. DNA synthesis was assessed 30-60 min after irradiation with 5 Gy. The DNA synthesis in unirradiated cultures was set to 100%. The error bars represent the SEM of 6 samples.

Fig. S2 Deletion of the 53BP1 BRCT domains does not affect DNA DSB repair or G2/M checkpoint control in response to low dose IR. *A*, Residual P-H2AX foci were assessed at various time points after exposure of cultures to 1 Gy and 2 Gy of IR. *B*, Mitotic cells were determined 1h after exposure to 0 Gy or 0.5 Gy by staining with propidium iodide and antibodies against phospho-histone H3. The error bars represent the SEM of triplicate samples.

Fig.S1

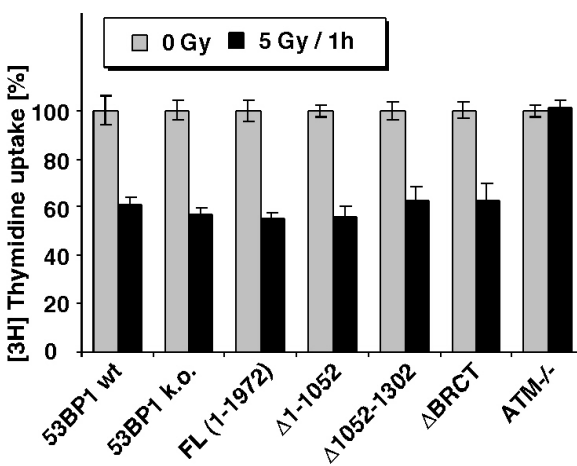

**Fig.S2**

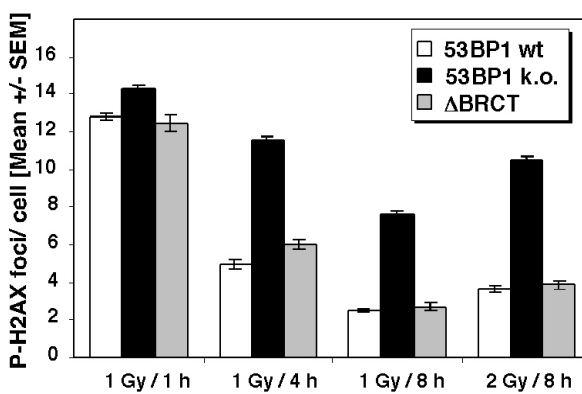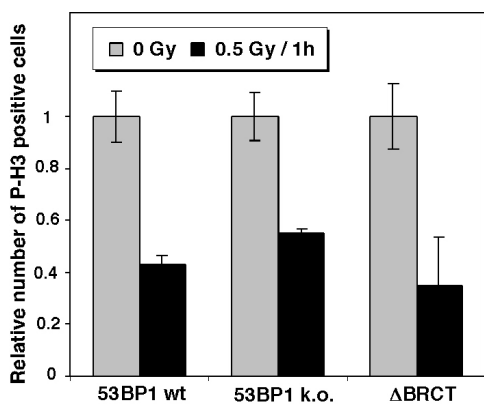

Supplement: NIHMS17756-supplement.pdf [file NIHMS17756-supplement.pdf]
